# Supplementary material
Source: publisher figshare collection journal article supplement (https://karger.figshare.com/articles/dataset/_/5126005)
Supplement: Supplementary file 1 [file 1]

Archive with 5 entries (5 files):
- 000357501_sm_Figure_1.pdf
- 000357501_sm_Figure_2.pdf
- 000357501_sm_Figure_3.pdf
- 000357501_sm_Figure_4.pdf
- 000357501_sm_Legends.doc
