# Supplementary material
Source: publisher figshare collection journal article supplement (https://karger.figshare.com/articles/dataset/_/5126005)
Supplement: Supplementary file 1 [file 1 › 000357501_sm_Figure_3.pdf]

## Photographs of the split thickness skin graft wounds from the individual patients

The symbols used are as follows:

O = Oleogel-S10 treatment

M = control moist wound dressing treatment (Mepilex)

The vertical dash indicates the change of dressing at 14 days.

The numbers under the photos and after the date indicate the degree of re-epithelialization, in %. The upper half of the wound is before the dash and the lower half after the dash. The maximum value is 50% equivalent to a fully epithelialized wound half.

### Patient 001 (born 1938; female)

Wound surface 84 cm<sup>2</sup> (~12 x 7 cm). STSG surgery on 15.04.2010

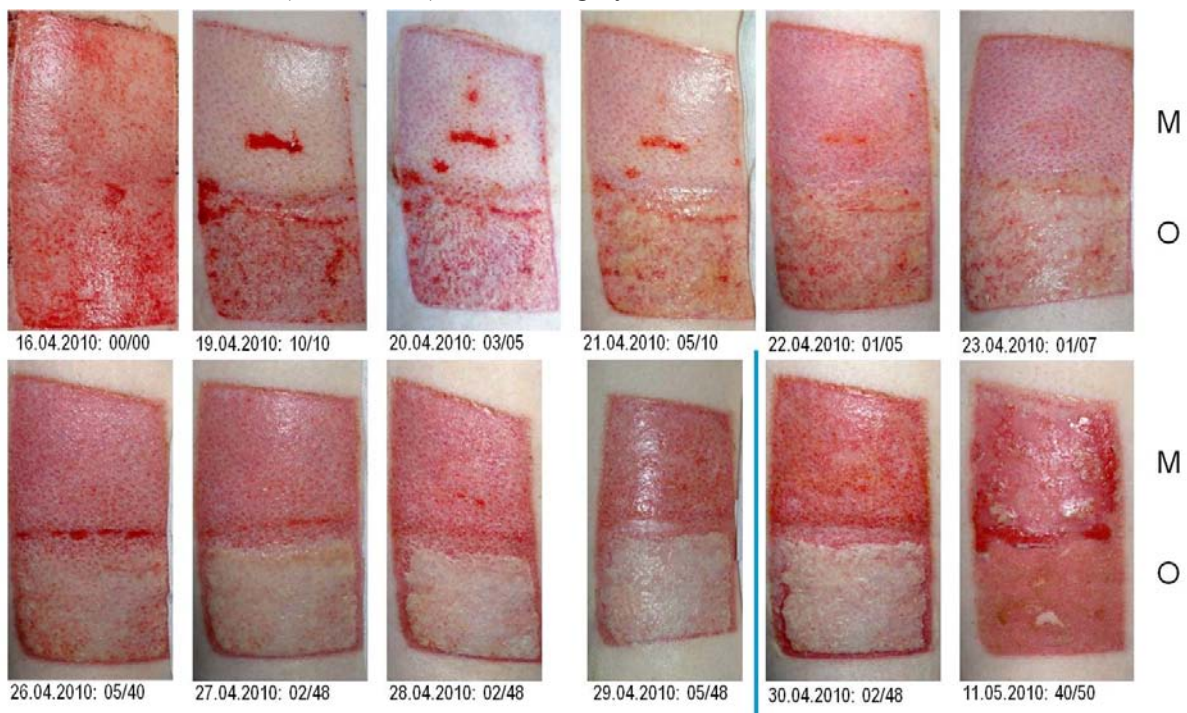

**Patient 002 (born 1937; male)**

Wound surface 28 cm<sup>2</sup> (~7 x 4 cm). STSG surgery on 19.04.2010

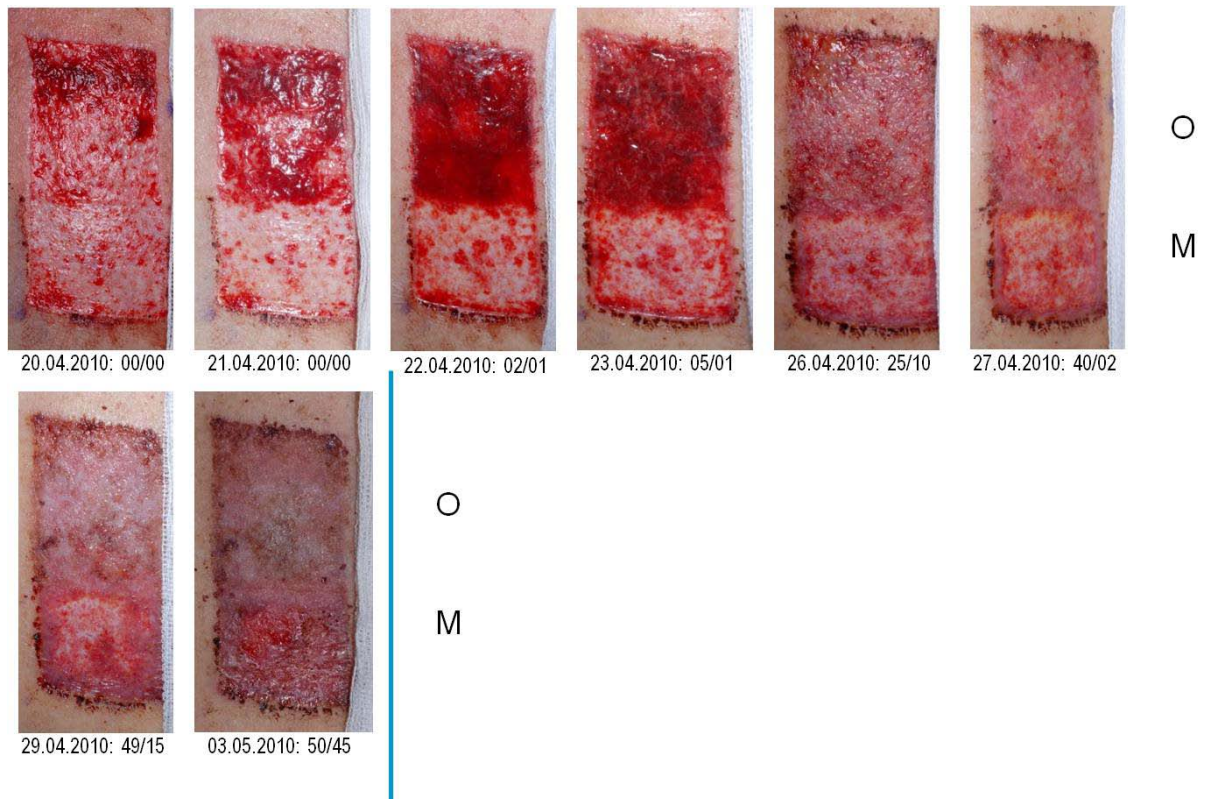

**Patient 003 (born 1932; female)**

Wound surface 14 cm<sup>2</sup> (~7 x 2 cm). STSG surgery on 19.04.2010

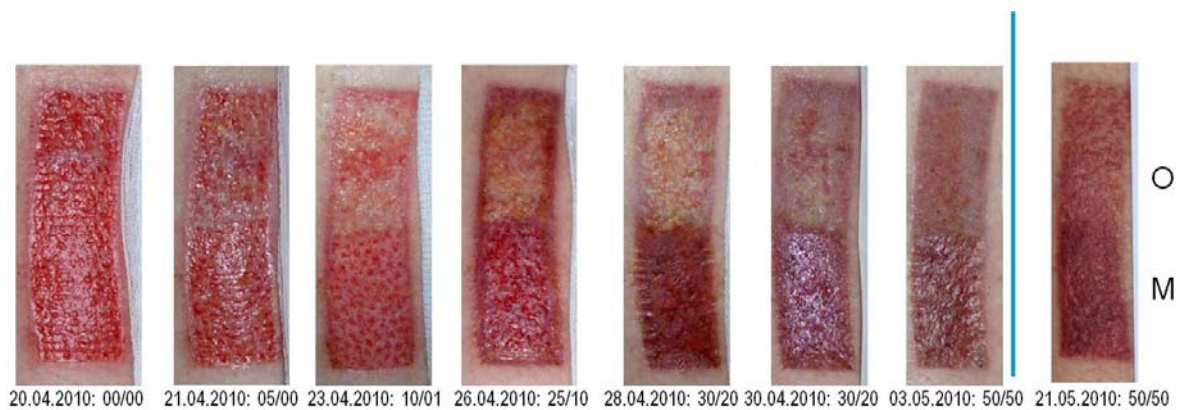

**Patient 004 (born 1932; female)**

Wound surface 12 cm<sup>2</sup> (~6 x 2 cm) STSG surgery on 21.04.2010

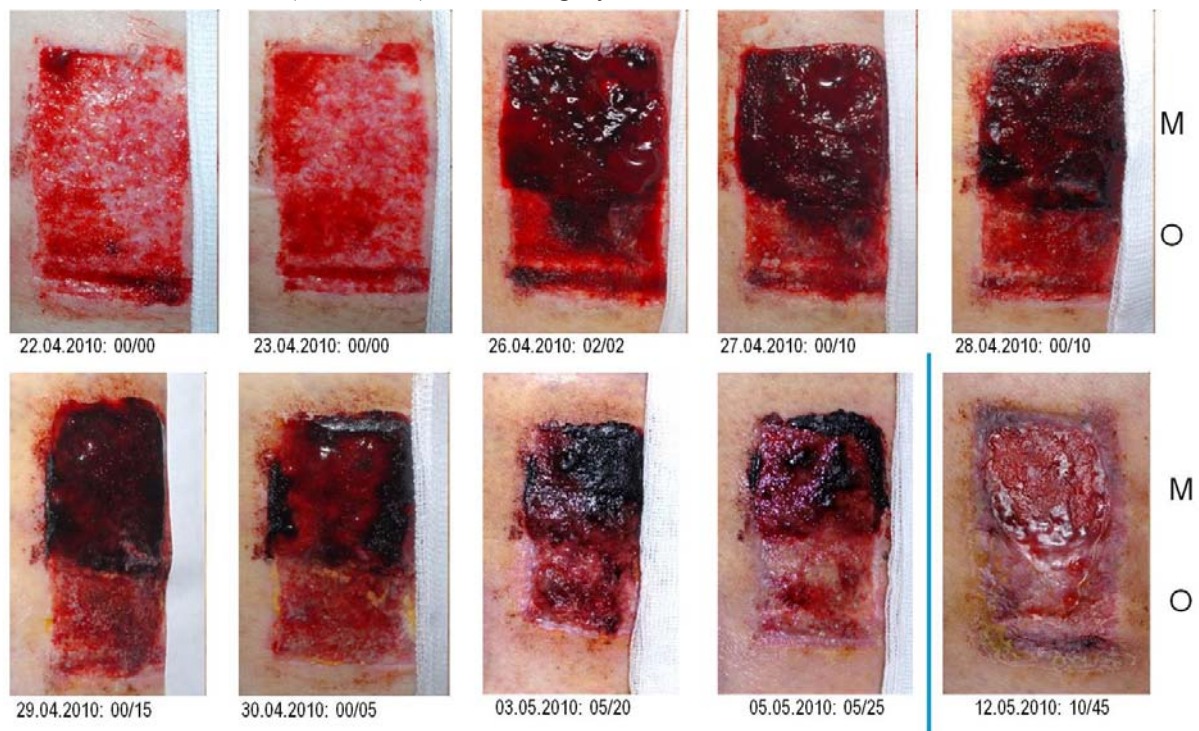

**Patient 005 (born 1935; male)**

Wound surface 12 cm<sup>2</sup> (~6 x 2 cm). STSG surgery on 27.04.2010

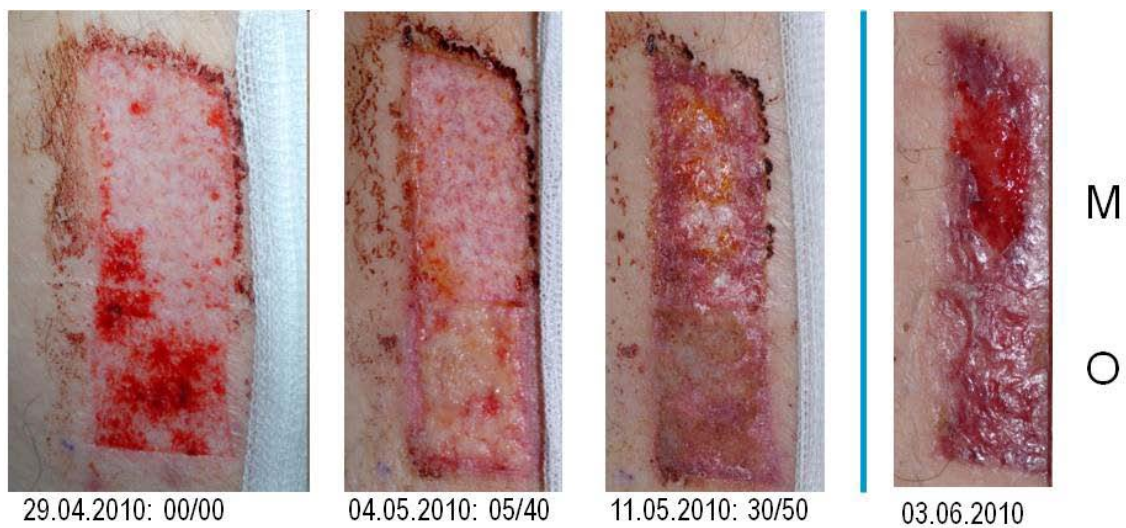

**Patient 006 (born 1955; male)**

Wound surface 21 cm<sup>2</sup> (~7 x 3 cm). STSG surgery on 22.04.2010

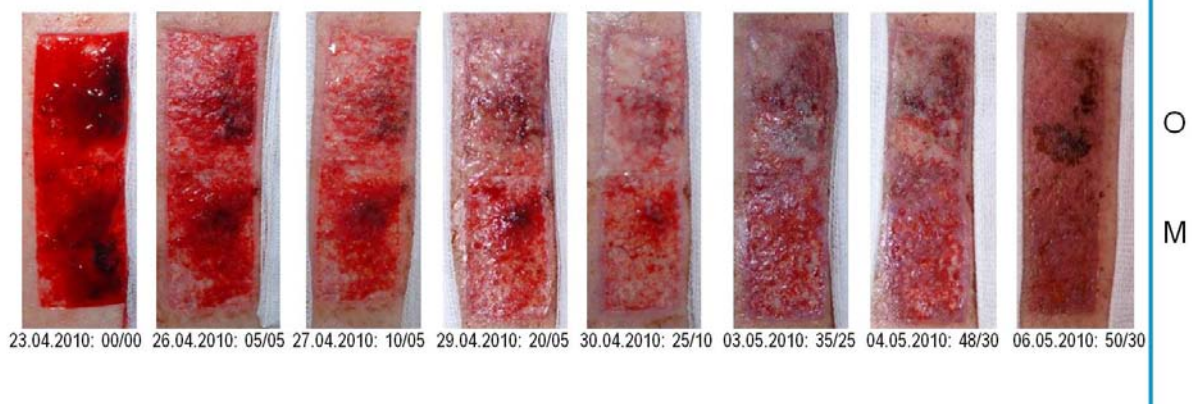

**Patient 007 (born 1959; female)**

Wound surface 24 cm<sup>2</sup> (~8 x 3 cm). STSG surgery on 28.04.2010

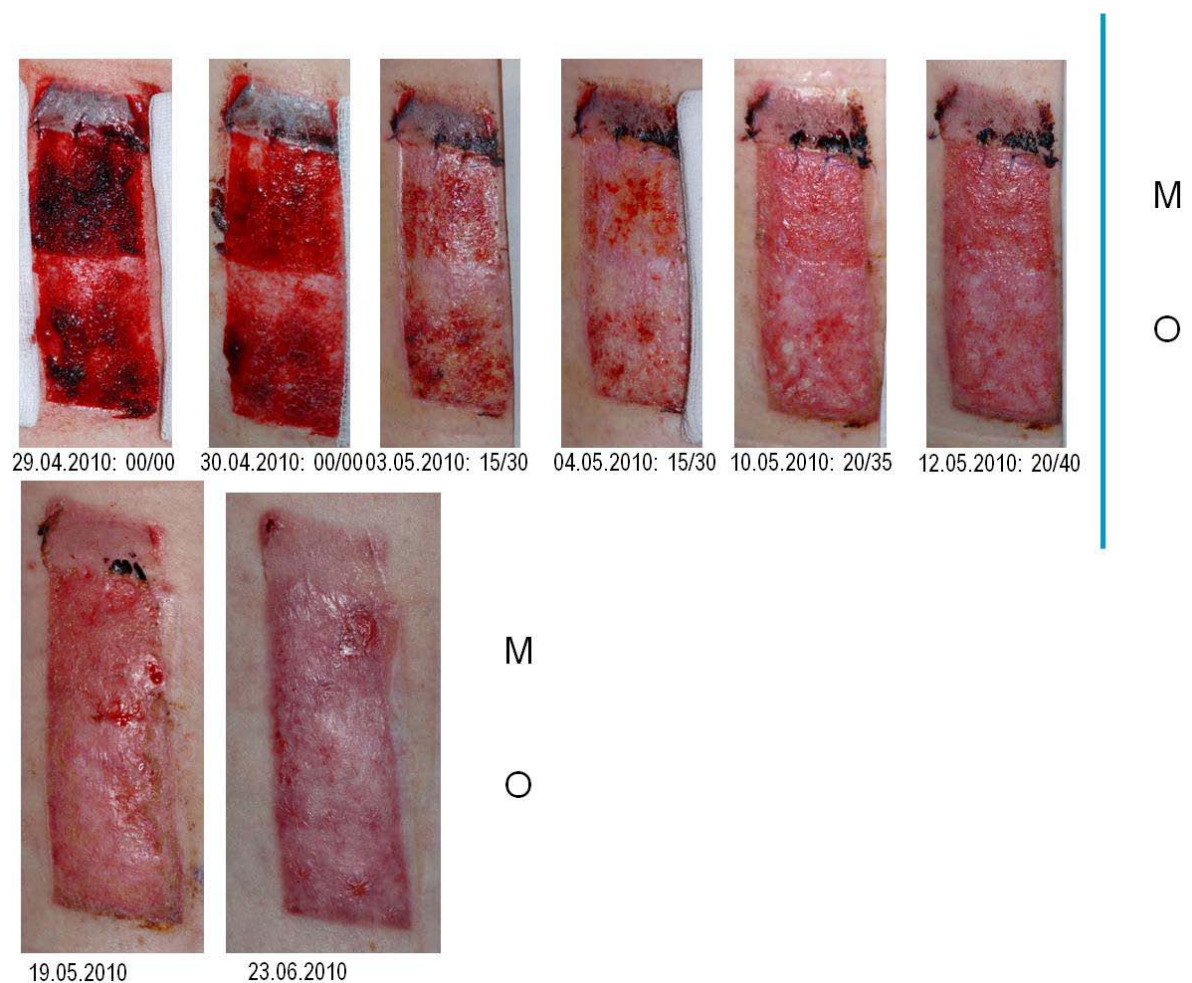

**Patient 008 (born 1951; male)**

Wound surface 15 cm<sup>2</sup> (~5 x 3 cm). STSG surgery on 10.05.2010

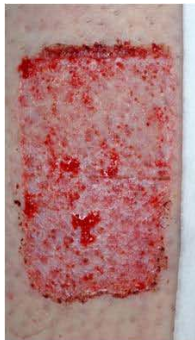

12.05.2010: 05/00

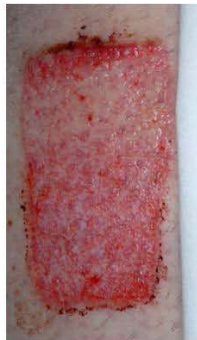

14.05.2010: 15/05

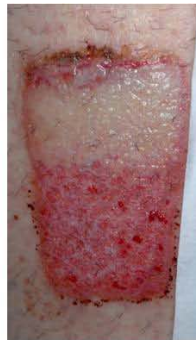

17.05.2010: 35/15

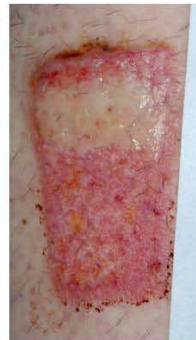

19.05.2010: 40/10

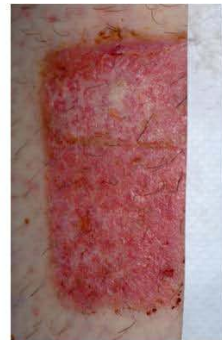

21.05.2010: 45/40

O

M

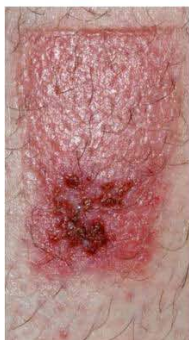

25.05.2010: 50/45

O

M

**Patient 009 (born 1988; male)**

Wound surface 45 cm<sup>2</sup> (~9 x 5 cm). STSG surgery on 05.05.2010

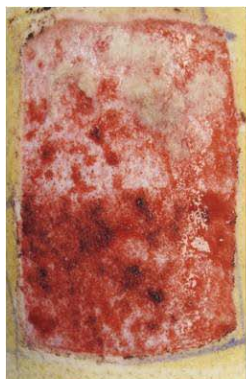

07.05.2010: 20/00

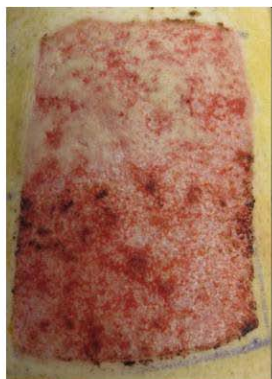

10.05.2010: 40/00

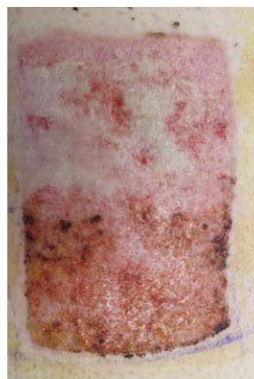

12.05.2010: 45/10

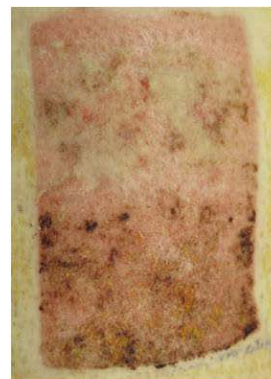

14.05.2010: 45/20

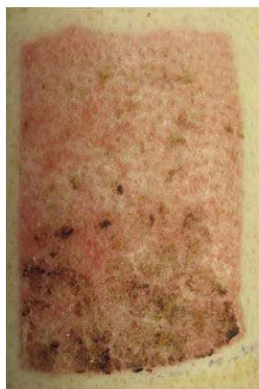

17.05.2010: 50/30

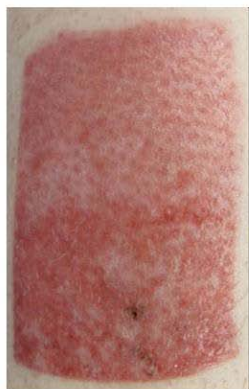

20.05.2010: 50/40

O  
M

O  
M

**Patient 010 (born 1964; male)**

Wound surface 160 cm<sup>2</sup> (~20 x 8 cm). STSG surgery on 06.05.2010

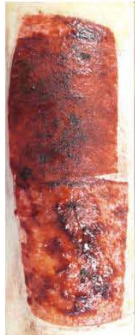

07.05.2010: 00/00

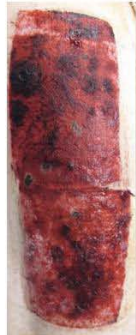

10.05.2010: 00/00

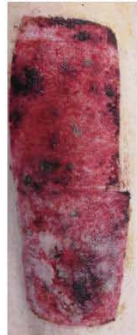

12.05.2010: 10/15

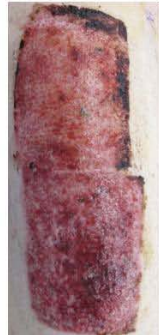

14.05.2010: 20/20

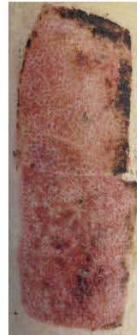

16.05.2010: 30/30

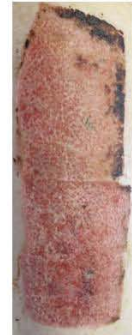

17.05.2010: 30/35

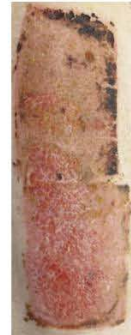

21.05.2010: 35/35

M

O

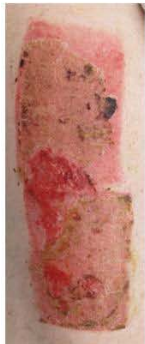

28.05.2010

M

O

**Patient 011 (born 1935; male)**

Wound surface 84 cm<sup>2</sup> (~14 x 6 cm). STSG surgery on 07.05.2010

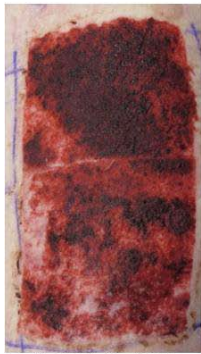

10.05.2010: 00/05

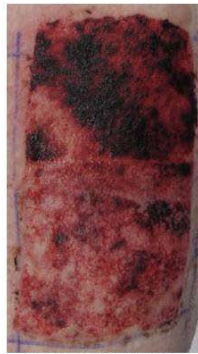

12.05.2010: 05/20

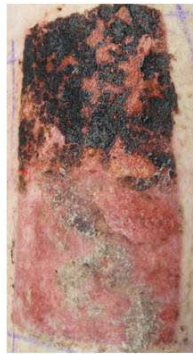

17.05.2010: 10/35

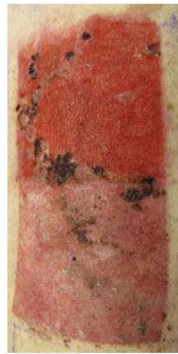

20.05.2010: 10/40

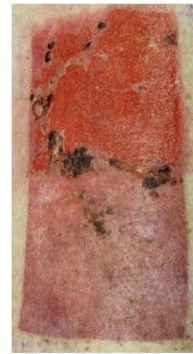

21.05.2010: 10/45

M

O

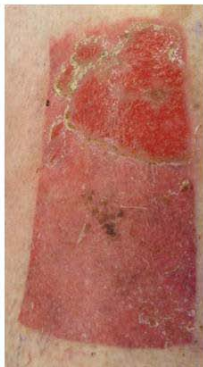

27.05.2010

M

O

**Patient 012 (born 1932; male)**

Wound surface 70 cm<sup>2</sup> (~10 x 7 cm). STSG surgery on 18.05.2010

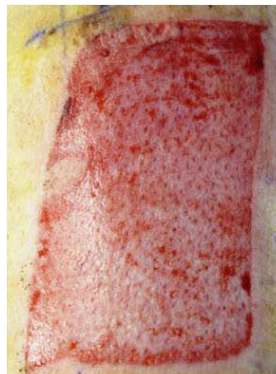

21.05.2010: 00/00

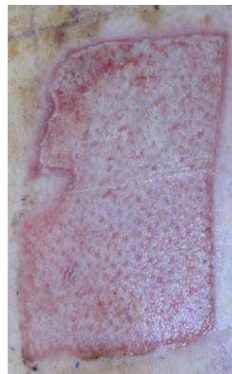

24.05.2010: 05/00

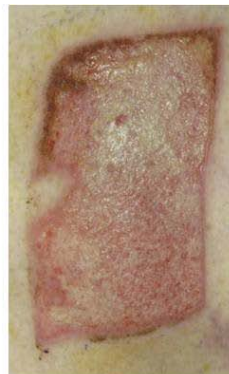

26.05.2010: 25/20

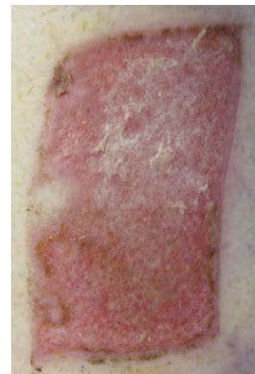

28.05.2010: 35/30

O

M

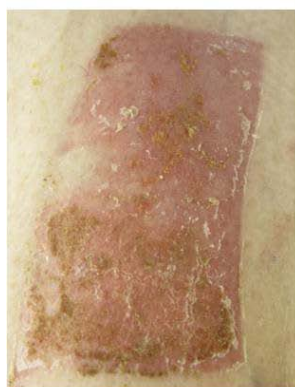

02.06.2010: 45/35

O

M

**Patient 013 (born 1964; male)**

Wound surface 160 cm<sup>2</sup> (~20 x 8 cm). STSG surgery on 20.05.2010

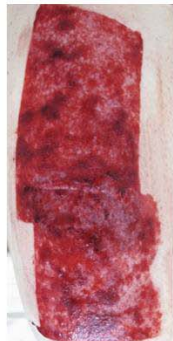

22.05.2010: 05/10

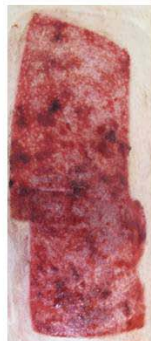

24.05.2010: 20/15

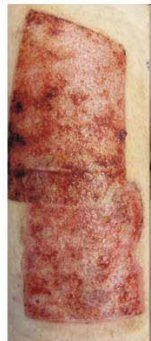

26.05.2010: 30/35

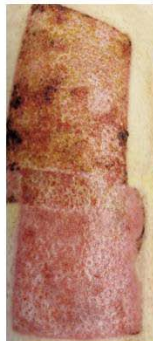

28.05.2010: 30/45

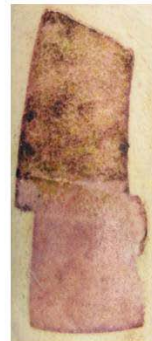

01.06.2010: 35/50

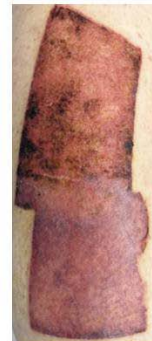

03.06.2010: 40/50

M  
O

**Patient 014 (born 1933; female)**

Wound surface 96 cm<sup>2</sup> (~12 x 8 cm). STSG surgery on 25.05.2010

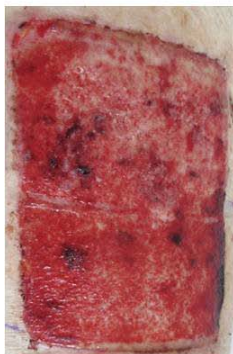

29.05.2010: 15/10

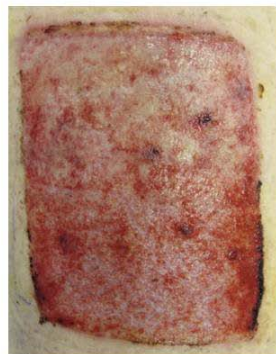

31.05.2010: 30/20

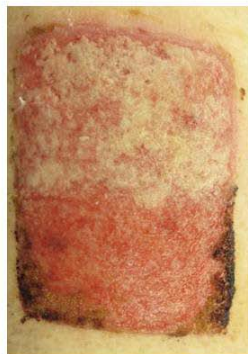

04.06.2010: 40/30

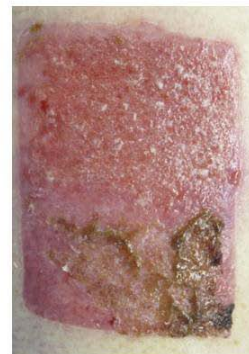

08.06.2010: 40/40

O  
M

**Patient 015 (born 1967; female)**

Wound surface 60 cm<sup>2</sup> (~10 x 6 cm). STSG surgery on 26.05.2010

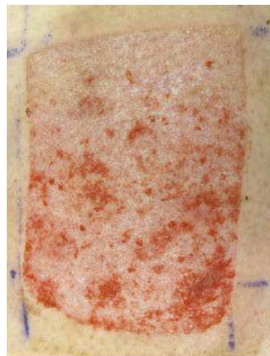

28.05.2010: 00/00

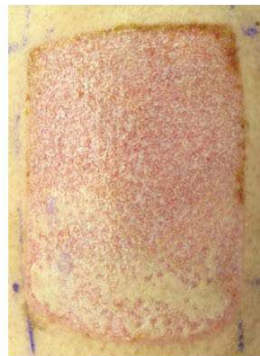

31.05.2010: 15/20

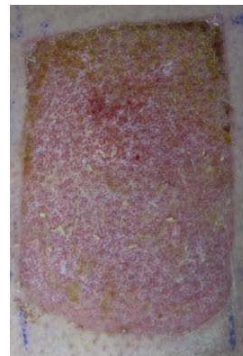

03.06.2010: 25/35

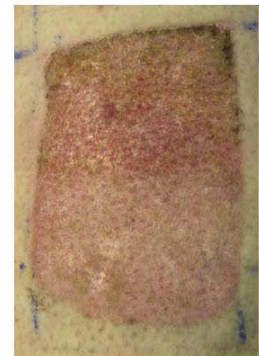

04.06.2010: 35/45

M

O

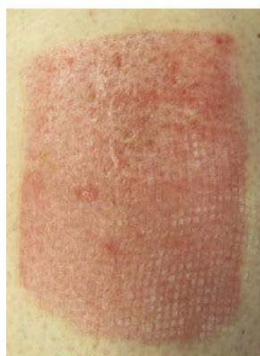

09.06.2010: 45/50

M

O

**Patient 016 (born 1939; male)**

Wound surface 32 cm<sup>2</sup> (~8 x 4 cm). STSG surgery on 28.05.2010

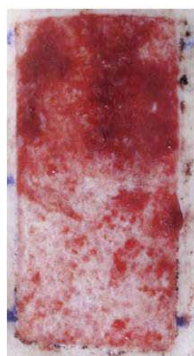

30.05.2010: 00/00

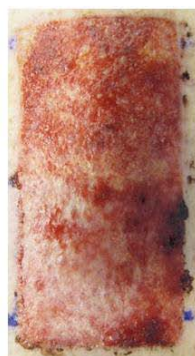

01.06.2010: 20/25

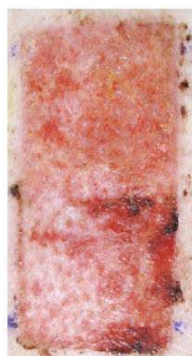

03.06.2010: 25/30

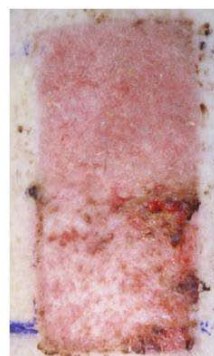

05.06.2010: 50/40

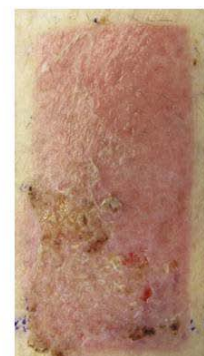

08.06.2010: 50/45

O

M

**Patient 017 (born 1961; male)**

Wound surface 10 cm<sup>2</sup> (~5 x 2 cm). STSG surgery on 05.05.2010

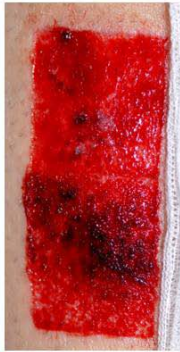

06.05.2010: 00/00

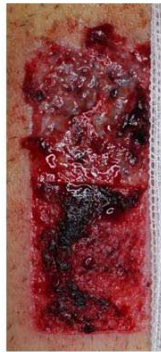

10.05.2010: 00/00

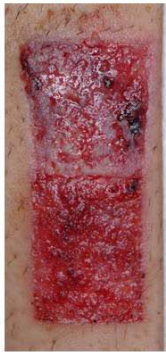

12.05.2010: 25/10

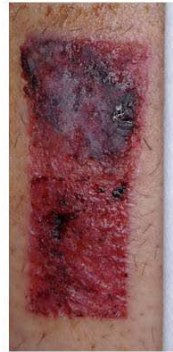

14.05.2010: 40/30

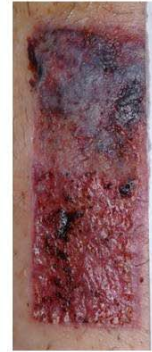

17.05.2010: 45/35

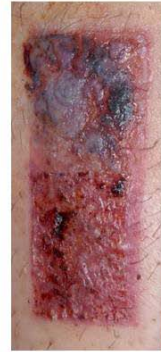

19.05.2010: 35/25

O

M

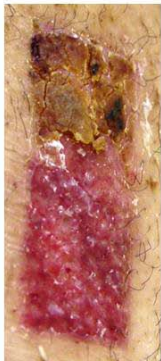

31.05.2010: 50/35

O

M

**Patient 018 (born 1958; male)**

Wound surface 10 cm<sup>2</sup> (~5 x 2 cm). STSG surgery on 05.05.2010

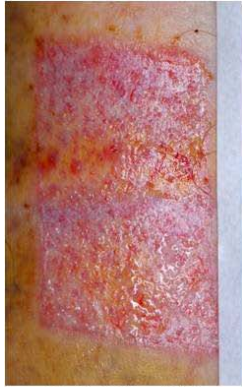

10.05.2010: 10/20

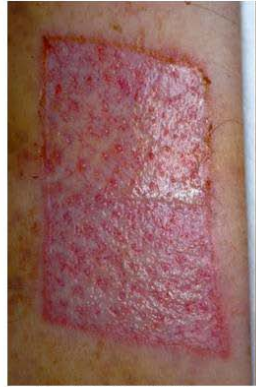

12.05.2010: 10/30

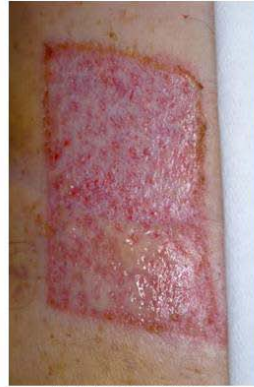

14.05.2010: 05/10

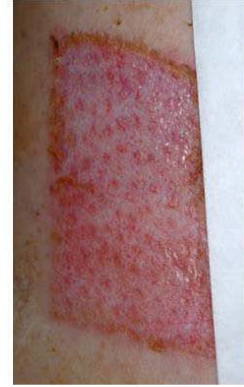

17.05.2010: 05/10

M

O

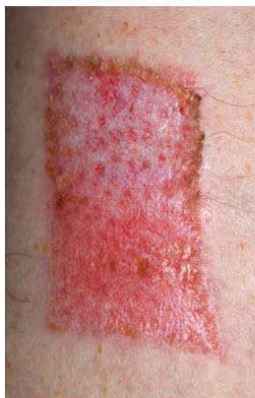

19.05.2010: 10/45

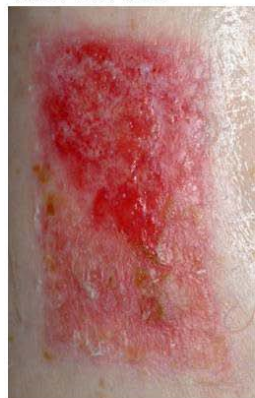

27.05.2010: 15/45

M

O

**Patient 019 (born 1952; male)**

Wound surface 10 cm<sup>2</sup> (~5 x 2 cm). STSG surgery on 05.05.2010

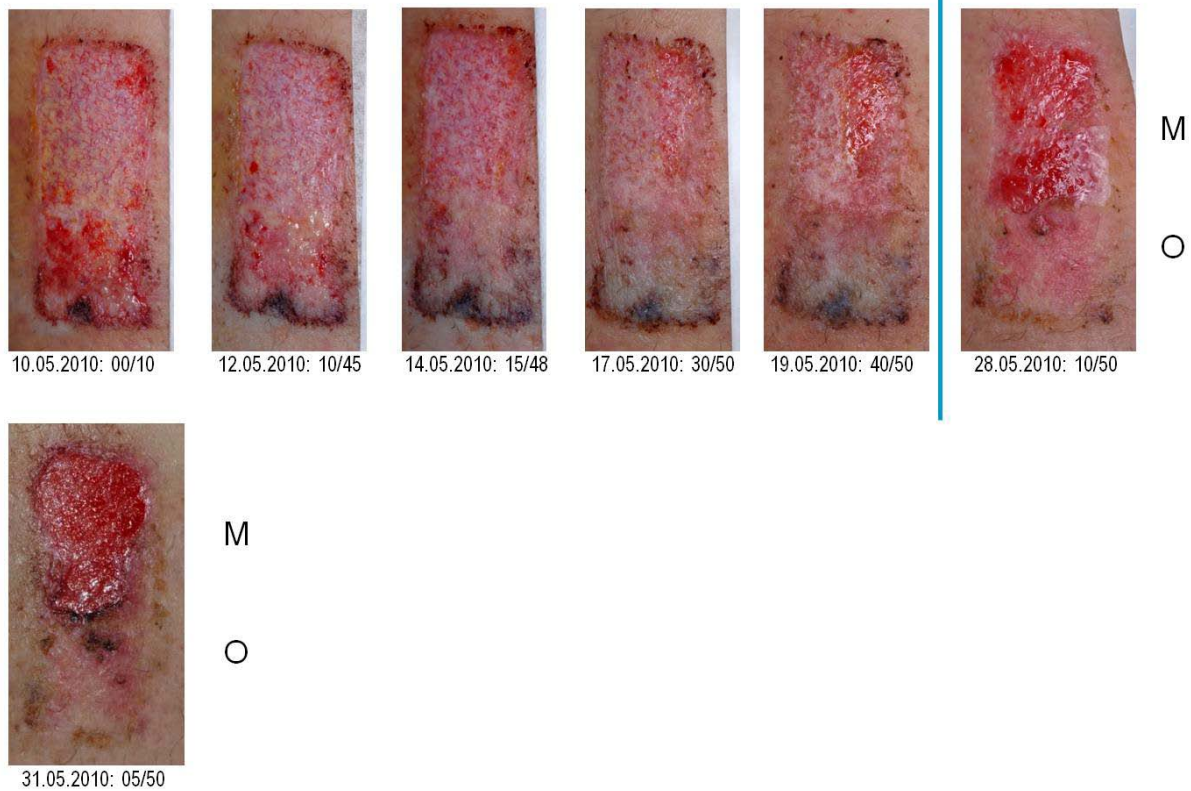

**Patient 020 (born 1951; male)**

Wound surface 10 cm<sup>2</sup> (~5 x 2 cm). STSG surgery on 17.05.2010

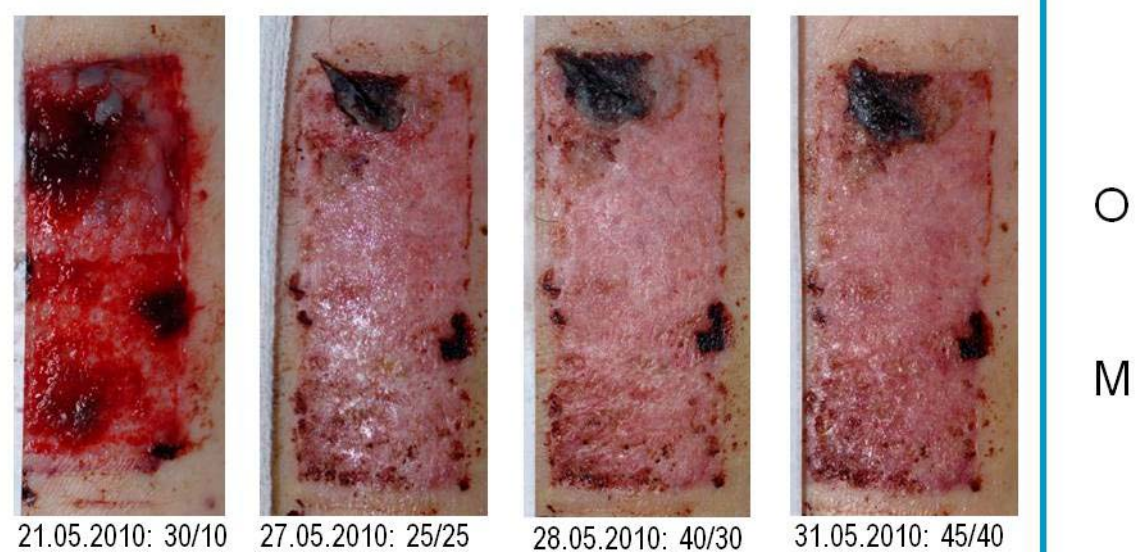

**Patient 021 (born 1930; female)**

Wound surface 20 cm<sup>2</sup> (~5 x 4 cm). STSG surgery on 14.05.2010

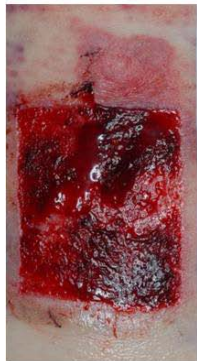

17.05.2010: 00/00

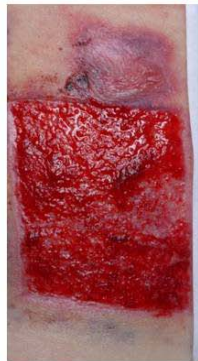

19.05.2010: 00/00

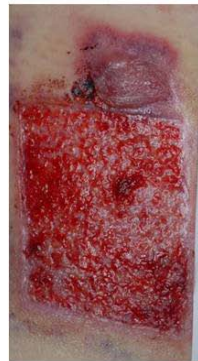

20.05.2010: 10/10

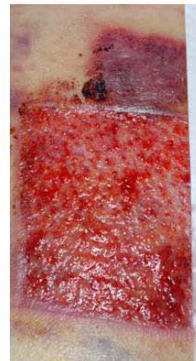

21.05.2010: 10/20

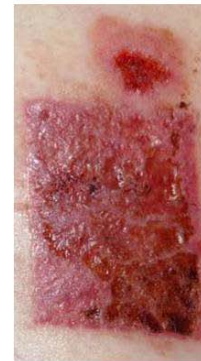

28.05.2010: 25/25

M  
O

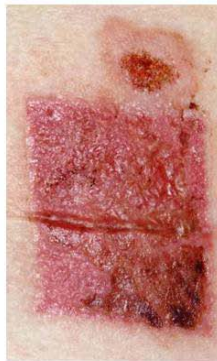

07.06.2010: 50/50

M  
O

**Patient 022 (born 1963; male)**

Wound surface 21 cm<sup>2</sup> (~7 x 3 cm). STSG surgery on 19.05.2010

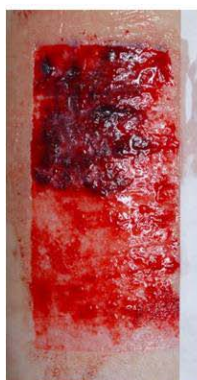

20.05.2010: 00/00

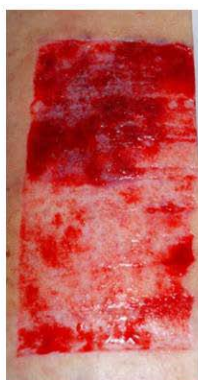

21.05.2010: 00/00

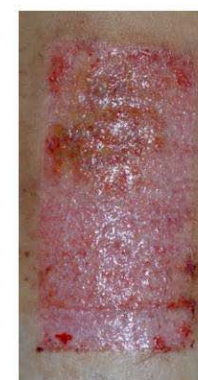

26.05.2010: 10/00

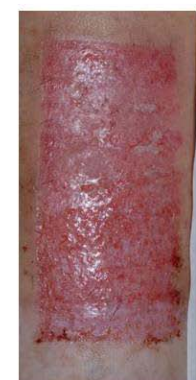

31.05.2010: 35/10

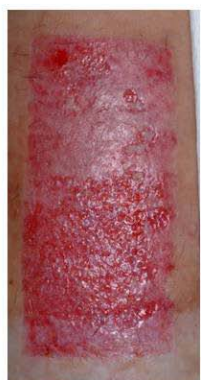

02.06.2010: 45/05

O  
M

**Patient 023 (born 1930; female)**

Y qwpf "uwthceg"32"eo "7"z"4"eo +0UVUI "wti gt { "qp"530704232"

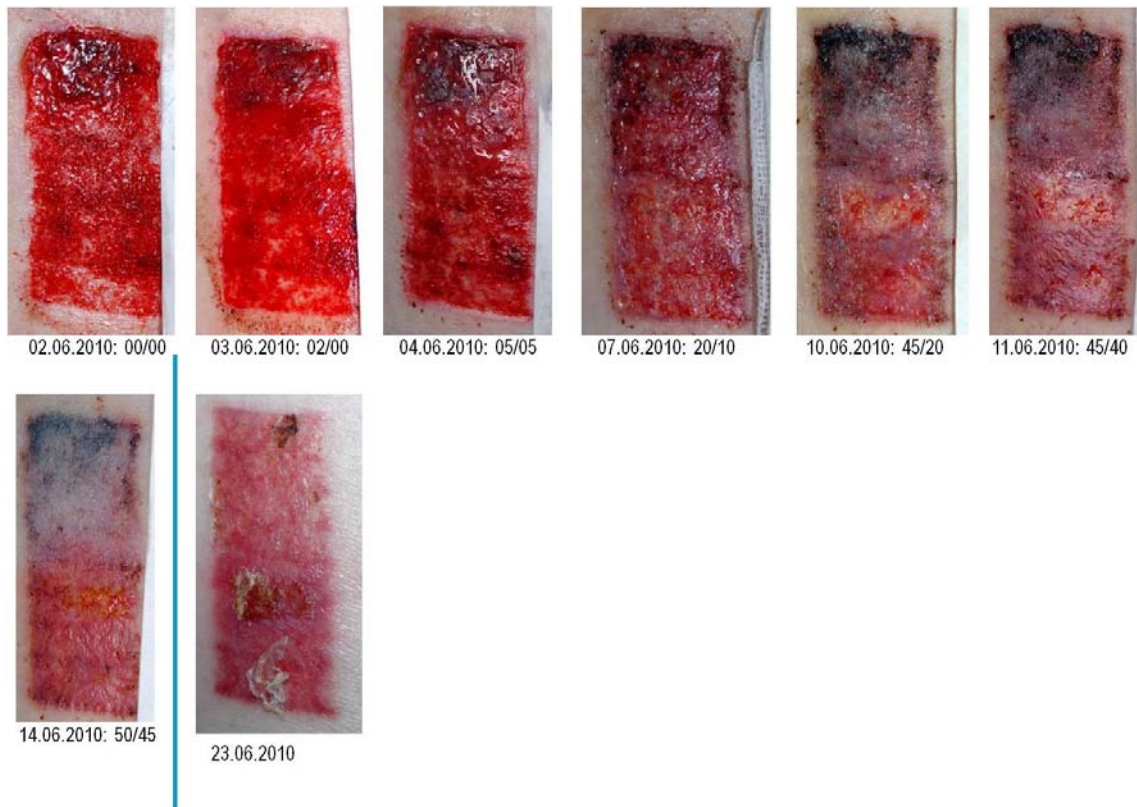

O  
M

"

"

**Patient 024 (born 1930; male)**

Y qwpf "uwthceg"3: "eo "8"z"5"eo +0UVUI "wti gt { "qp"240804232"

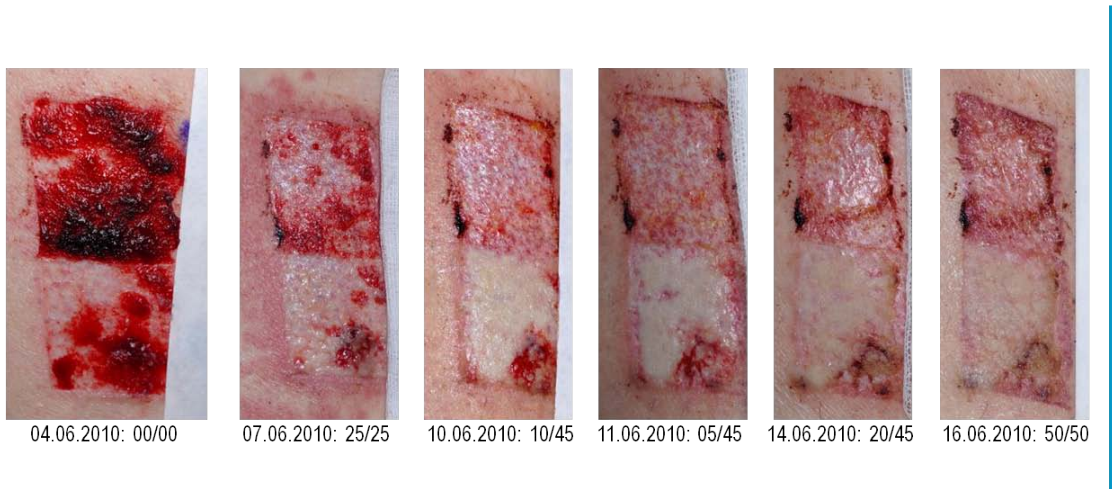

M  
O

"

"
