# Supplementary material
Source: publisher figshare collection journal article supplement (https://karger.figshare.com/articles/dataset/_/5126005)

3 month follow up. Date of photograph and patient number are provided at the bottom of the photograph.

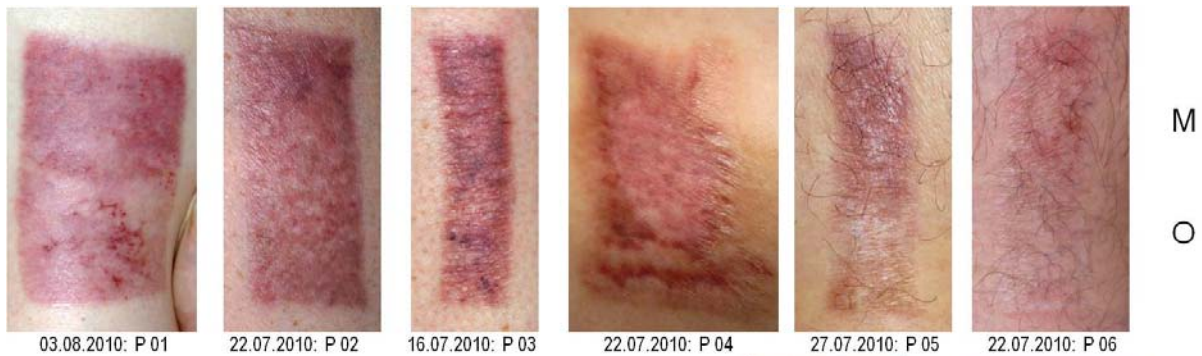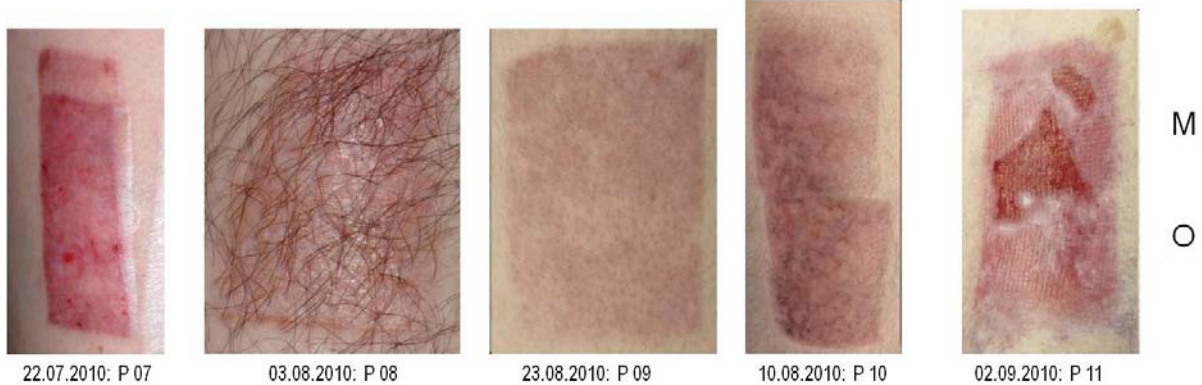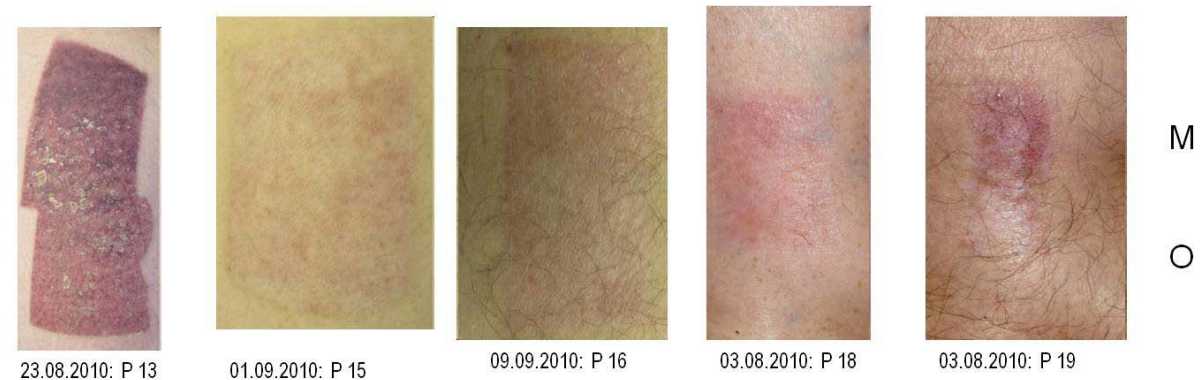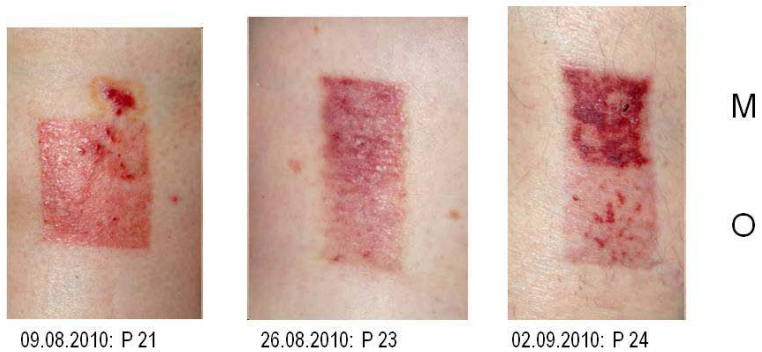

Supplement: Supplementary file 1 [file 1 › 000357501_sm_Figure_4.pdf]
