# Supplementary material
Source: publisher figshare collection journal article supplement (https://karger.figshare.com/articles/dataset/_/5126005)

**Supplemental Fig. 1:**

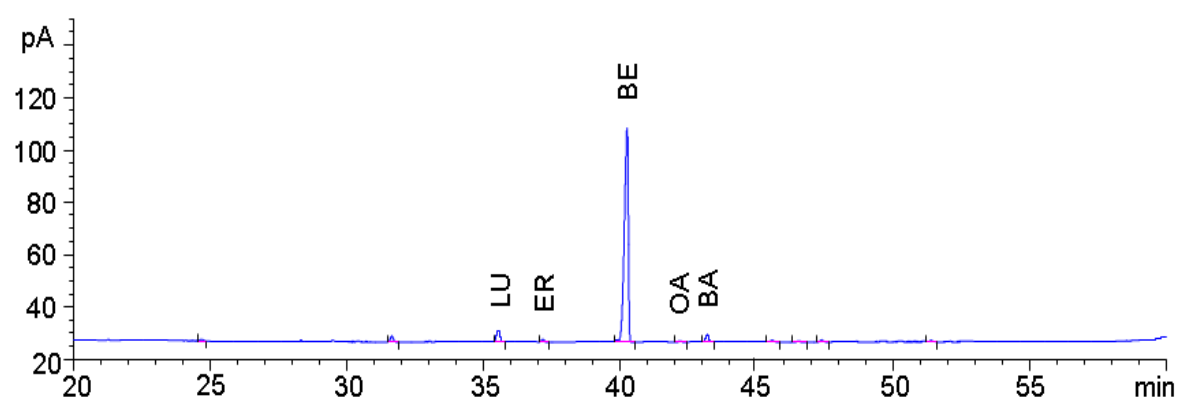

Supplement: Supplementary file 1 [file 1 › 000357501_sm_Figure_1.pdf]

Supplemental Fig. 2:

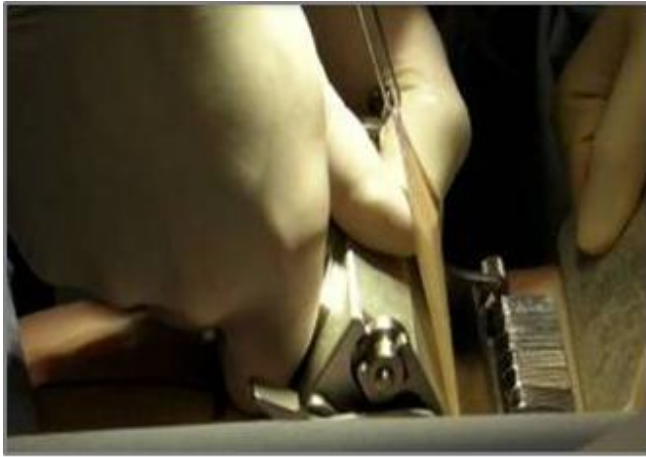

a

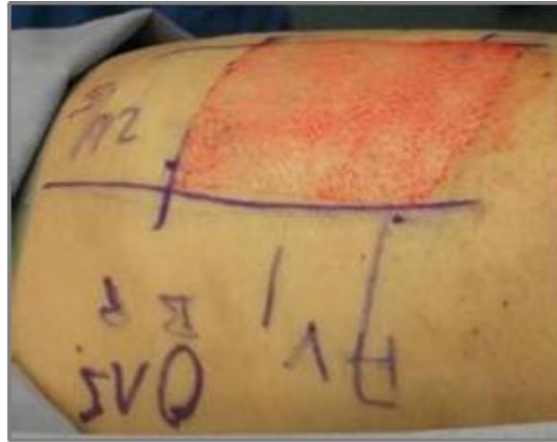

b

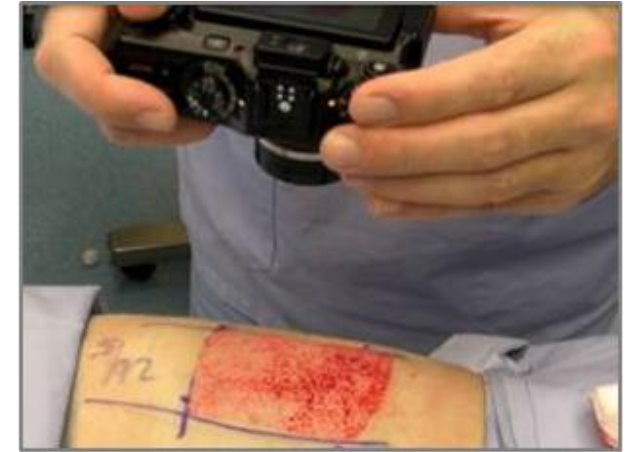

c

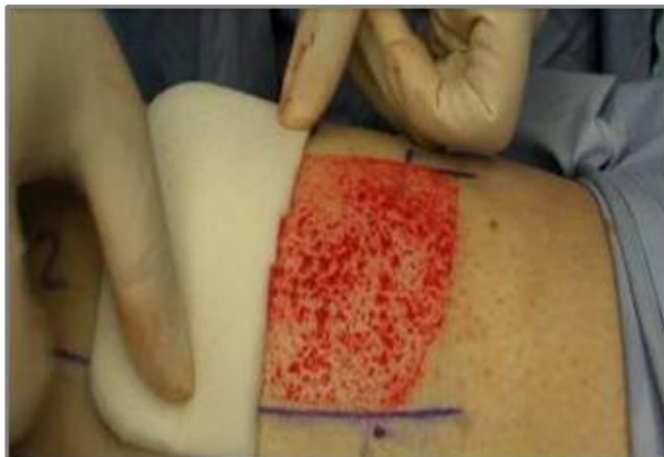

d

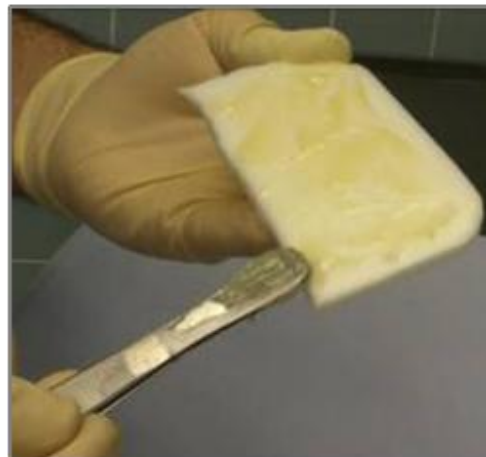

e

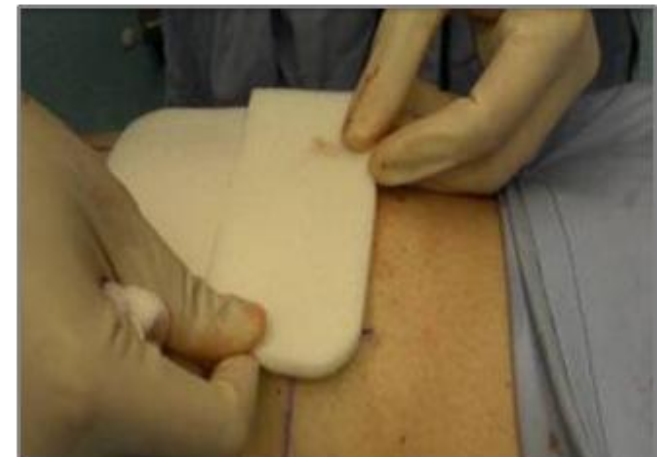

f

Supplement: Supplementary file 1 [file 1 › 000357501_sm_Figure_2.pdf]
